# Supplementary material
Source: PubMed Central journal article supplement (PMC2901991)
Supplement: NIHMS210484-supplement-supp.pdf [file NIHMS210484-supplement-supp.pdf]

# The Spectrum of Mutations in Progranulin

## A Collaborative Study Screening 545 Cases of Neurodegeneration

Chang-En Yu, PhD; Thomas D. Bird, MD; Lynn M. Bekris, PhD; Thomas J. Montine, MD, PhD; James B. Leverenz, MD; Ellen Steinbart, MA; Nichole M. Galloway, BS; Howard Feldman, MD; Randall Woltjer, MD; Carol A. Miller, MD; Elisabeth McCarty Wood, MS; Murray Grossman, MD; Leo McCluskey, MD, MBE; Christopher M. Clark, MD; Manuela Neumann, MD; Adrian Danek, MD; Douglas R. Galasko, MD; Steven E. Arnold, MD; Alice Chen-Plotkin, MD; Anna Karydas, BA; Bruce L. Miller, MD; John Q. Trojanowski, MD, PhD; Virginia M.-Y. Lee, PhD; Gerard D. Schellenberg, PhD; Viviana M. Van Deerlin, MD, PhD

Arch Neurol. 2010;67(2):161-170

**Table 1. GRN Intronic Variants and Polymorphisms Observed in This Study**

| Coding DNA NM_002087.2                                    | Predicted Protein NP_002078.1 | MAF (Count)                 |                                 |                         | Case Information |           |        |          |                     |  |
|-----------------------------------------------------------|-------------------------------|-----------------------------|---------------------------------|-------------------------|------------------|-----------|--------|----------|---------------------|--|
|                                                           |                               | Cases <sup>a</sup> (n=1090) | Controls 1 <sup>b</sup> (n=760) | Controls 2 <sup>c</sup> | ID               | Dx        | AAO, y | FH       | Source <sup>d</sup> |  |
| <b>Intronic Variations (Pathogenic Potential Unknown)</b> |                               |                             |                                 |                         |                  |           |        |          |                     |  |
| c.264+7G>A                                                | NC                            | 0.002 (2)                   | 0.007 (5)                       | 0.005 (6/1124)          | ANA01            | FTD       | 62     | Yes      | 30-32               |  |
|                                                           |                               |                             |                                 |                         | ARC04            | FTD       | 46     | Possible |                     |  |
|                                                           |                               |                             |                                 |                         | UPA118           | FTLD-U    | Unk    | Unk      |                     |  |
|                                                           |                               |                             |                                 |                         | UPC1189          | ALS       | 73     | Yes      |                     |  |
| c.265-27C>A                                               | NC                            | 0.001 (1)                   | 0.001 (1)                       | NA                      | CBG01            | CBD       | 81     | No       | Novel               |  |
| c.349+62G>C                                               | NC                            | 0.001 (1)                   | NA                              | 0.003 (1/380)           | UP78             | FTD       | 67     | Possible | 30                  |  |
| c.598+39G>A                                               | NC                            | 0.001 (1)                   | NA                              | NA                      | GB03             | DLDH      | 40     | Yes      | Novel               |  |
| c.708+6_+9delTGAG                                         | ? <sup>e</sup>                | 0.001 (1)                   | 0.000 (0)                       | NA                      | UPA241           | FTLD-U    | 69     | Possible | Novel               |  |
| c.709-17C>T                                               | NC                            | 0.001 (1)                   | 0.000 (0)                       | NA                      | CCW01            | FTD       | 44     | Yes      | Novel               |  |
| c.934-19C>A                                               | NC                            | 0.001 (1)                   | NA                              | NA                      | UP230            | PMA       | 58     | Possible | Novel               |  |
| c.1413+20C>T                                              | NC                            | 0.001 (1)                   | NA                              | NA                      | HOG01            | FTD (MND) | 61     | No       | Novel               |  |
| c.1645-40C>T                                              | NC                            | 0.001 (1)                   | NA                              | NA                      | UP414            | FTD       | 50     | No       | Novel               |  |
| <b>Polymorphism (MAF ≥ 0.01)</b>                          |                               |                             |                                 |                         |                  |           |        |          |                     |  |
| c.55C>T (rs63750723)                                      | p.R19W                        | 0.001 (1)                   | NA                              | 0.028 (13/450)          |                  |           |        |          | 11, 31              |  |
| c.264+21G>A (rs9897526)                                   | NC                            | 0.110 (116)                 | NA                              | 0.103 (106/1026)        |                  |           |        |          | 30, 32              |  |
| c.350-50_-47dupGTCA (rs34424835)                          | NC                            | 0.197 (206)                 | NA                              | 0.236 (207/877)         |                  |           |        |          | 31, 32              |  |
| c.384T>C (rs25646)                                        | p.D128                        | 0.024 (25)                  | 0.045 (34)                      | 0.025 (26/1046)         |                  |           |        |          | 11, 32              |  |
| c.462+24G>A (rs850713)                                    | NC                            | 0.193 (203)                 | NA                              | 0.228 (147/646)         |                  |           |        |          | 32                  |  |
| c.835+7G>A                                                | NC                            | 0.069 (72)                  | NA                              | 0.074 (77/1046)         |                  |           |        |          | 30-32               |  |
| c.*78C>T (rs5848) <sup>f</sup>                            | NC                            | 0.261 (274)                 | NA                              | 0.272 (176/646)         |                  |           |        |          | 32                  |  |

Abbreviations: AAO, age at onset; ALS, amyotrophic lateral sclerosis; CBD, corticobasal degeneration; DLHD, dementia lacking distinctive histopathology; Dx, diagnosis; FH, family history; FTD, frontotemporal dementia; FTLD-U, frontotemporal lobar degeneration with ubiquitin-positive inclusions; ID, identifier; MAF, minor allele frequency; MND, motor neuron disease; NA, not available; NC, no change; PMA, progressive muscular atrophy; Unk, unknown.

<sup>a</sup>Frequency in 1090 chromosomes (all cases); numbers in parentheses indicate counts.

<sup>b</sup>Frequency in our 760 control chromosomes; numbers in parentheses indicate counts.

<sup>c</sup>Combined control frequency from the references; numbers in parentheses indicate counts over chromosomes screened.

<sup>d</sup>Numbers represent reference numbers.

<sup>e</sup>Position or prediction uncertain.

<sup>f</sup>\*Stop codon.

**eTable 2. In Silico and Ex Vivo Splicing Analysis of Splice Site Variations**

| Variation   | Allele | Sequence <sup>a</sup> | NNSPLICE Score |               | Location in Gene | Effect of Variant Allele in Minigene Splicing <sup>b</sup>                                                       | Predicted Protein NP_002078.1 |
|-------------|--------|-----------------------|----------------|---------------|------------------|------------------------------------------------------------------------------------------------------------------|-------------------------------|
|             |        |                       | Donor Site     | Acceptor Site |                  |                                                                                                                  |                               |
| c.264+2T>C  | T      | CAGAGgtgag            | 0.98           | NC            | Intron 2         | (1) Inclusion of entire intron 2<br>(2) Activate cryptic site in intron 2 with inclusion of 34 bp 5' of intron 2 | p.V90SfsX67<br>p.V90SfsX40    |
|             | C      | CAGAGgctgag           | <0.005         | NC            |                  |                                                                                                                  |                               |
| c.348A>C    | A      | ATCAGgtgca            | 0.26           | NC            | Exon 3           | (1) Exclusion of entire exon 3<br>(2) Inclusion of entire intron 3                                               | p.A89VfsX139<br>p.N118AfsX82  |
|             | C      | ATCCGgtgca            | 0.04           | NC            |                  |                                                                                                                  |                               |
| c.709-2A>G  | A      | ctcagGCCAC            | NC             | 0.95          | Intron 6         | Activate cryptic site in exon 7 with inclusion of 87 bp 3' of exon 7                                             | p.A237TfsX6                   |
|             | G      | ctcggGCCAC            | NC             | <0.005        |                  |                                                                                                                  |                               |
| c.1179+2T>C | T      | CAGAGgtata            | 0.73           | NC            | Intron 9         | Activate cryptic site in intron 9 with inclusion of 35 bp 5' of intron 9                                         | p.V395YfsX29                  |
|             | C      | CAGAGgcata            | <0.005         | NC            |                  |                                                                                                                  |                               |
| c.1414-2A>G | A      | gccagGCTGT            | NC             | 0.97          | Intron 10        | Inclusion of entire intron 10                                                                                    | p.A472VfsX10                  |
|             | G      | gccggGCTGT            | NC             | <0.005        |                  |                                                                                                                  |                               |

Abbreviations: bp, base pairs; NC, no change; NNSPLICE, Splice Site Prediction by Neural Network.<sup>39</sup>

<sup>a</sup>Exon in uppercase and intron in lowercase. Nucleotide variants are presented in boldface.

<sup>b</sup>Numbers in parentheses represent intensity ranking of the spliced polymerase chain reaction bands in Figure 2 of the accompanying article.

**eTable 3. Functional Analysis and Prediction of Missense Variations<sup>a</sup>**

| Coding DNA<br>NM_002087.2 | Predicted Protein<br>NP_002078.1 | MAF in Ctrl (Chr) <sup>b</sup> | Property of AA |            | PGRN Domain <sup>c</sup> | Deleterious (Pathological) Prediction |                       |                   | RESCUE-ESE Analysis | Splice Assay |
|---------------------------|----------------------------------|--------------------------------|----------------|------------|--------------------------|---------------------------------------|-----------------------|-------------------|---------------------|--------------|
|                           |                                  |                                | Original       | Substitute |                          | PMut <sup>d</sup>                     | PolyPhen <sup>e</sup> | SIFT <sup>f</sup> |                     |              |
| c.26C>A                   | p.A9D                            | 0.000 (0/500)                  | NP             | Acidic     | NA                       | <b>Yes</b> (0.62, 2)                  | <b>Yes</b> (1.63)     | No (0.60)         | NC                  | NC           |
| c.55C>T                   | p.R19W                           | 0.028 (13/450)                 | Basic          | NP         | P (no)                   | <b>Yes</b> (0.83, 6)                  | No (0.42)             | <b>Yes</b> (0.02) | NC                  | ND           |
| c.208G>A                  | p.G70S                           | 0.001 (1/760)                  | NP             | UP         | G (no)                   | <b>Yes</b> (0.57, 1)                  | <b>Yes</b> (1.72)     | No (0.58)         | NC                  | ND           |
| c.229G>A                  | p.V77I                           | 0.000 (0/760)                  | NP             | NP         | G (no)                   | No (0.01, 9)                          | No (0.42)             | No (0.21)         | NC                  | ND           |
| c.313T>C                  | p.C105R                          | 0.000 (0/760)                  | UP             | Basic      | G ( <b>yes</b> )         | <b>Yes</b> (0.89, 7)                  | <b>Yes</b> (4.12)     | No (0.11)         | NC                  | NC           |
| c.545C>T                  | p.T182M                          | 0.000 (0/760)                  | UP             | NP         | NA                       | <b>Yes</b> (0.51, 0)                  | <b>Yes</b> (1.53)     | No (0.12)         | NC                  | NC           |
| c.634C>T                  | p.R212W                          | 0.001 (1/760)                  | Basic          | NP         | B (no)                   | <b>Yes</b> (0.88, 7)                  | <b>Yes</b> (1.64)     | <b>Yes</b> (0.02) | <b>Addition</b>     | ND           |
| c.752C>G                  | p.T251S                          | 0.000 (0/760)                  | UP             | UP         | B (no)                   | No (0.02, 9)                          | No (0.99)             | No (0.75)         | NC                  | NC           |
| c.827C>T                  | p.A276V                          | 0.000 (0/760)                  | NP             | NP         | NA                       | No (0.17, 6)                          | No (0.83)             | No (0.33)         | NC                  | <b>Yes</b>   |
| c.893G>A                  | p.R298H                          | 0.000 (0/760)                  | Basic          | Basic      | H (no)                   | <b>Yes</b> (0.70, 4)                  | No (0.49)             | No (0.53)         | NC                  | ND           |
| c.970G>A                  | p.A324T                          | 0.008 (3/367)                  | NP             | UP         | A (no)                   | No (0.34, 3)                          | No (0.02)             | No (0.55)         | NC                  | ND           |
| c.1058G>A                 | p.S353N                          | 0.001 (1/760)                  | UP             | UP         | NA                       | No (0.02, 9)                          | No (1.45)             | No (0.58)         | NC                  | ND           |
| c.1070C>G                 | p.P357R                          | 0.000 (0/760)                  | NP             | Basic      | NA                       | <b>Yes</b> (0.84, 6)                  | No (0.89)             | No (0.54)         | NC                  | ND           |
| c.1253G>A                 | p.R418Q                          | 0.002 (2/896)                  | Basic          | UP         | Q (no)                   | No (0.36, 2)                          | No (0.33)             | No (0.58)         | NC                  | NC           |
| c.1297C>T                 | p.R433W                          | 0.005 (9/1690)                 | Basic          | NP         | NA                       | <b>Yes</b> (0.97, 9)                  | <b>Yes</b> (1.91)     | No (0.20)         | NC                  | NC           |
| c.1544G>C                 | p.G515A                          | 0.004 (6/1406)                 | NP             | NP         | NA                       | <b>Yes</b> (0.62, 2)                  | No (1.12)             | No (0.85)         | NC                  | ND           |

Abbreviations: AA, amino acid; Chr, chromosome; Ctrl, controls; ESE, exon splicing enhancer; MAF, minor allele frequency; NA, not applicable; NC, no change; ND, not done; NP, nonpolar; PGRN, progranulin; UP, uncharged polar.

<sup>a</sup>Boldface type highlights positive results.

<sup>b</sup>Counts over number of chromosomes screened.

<sup>c</sup>Yes and no in parentheses indicate alteration of consensus sequence in motif.

<sup>d</sup>Neural network output and reliability scores are listed in parentheses.

<sup>e</sup>Positron-specific independent count score differences are listed in parentheses.

<sup>f</sup>Probabilities are listed in parentheses.

**eTable 4. Functional Analysis and Prediction of Silent Variations**

| Coding DNA<br>NM_002087.2 | Protein<br>NP_002078.1 | MAF in Ctrl (Chr) <sup>a</sup> | RESCUE-ESE Analysis |          | Effect of Variant Allele |          |
|---------------------------|------------------------|--------------------------------|---------------------|----------|--------------------------|----------|
|                           |                        |                                | ESE Site            | Sequence | Heterologous             | Minigene |
| c.99C>T                   | p.D33                  | 0.008 (11/1314)                | Addition            | TGGATC   | No                       | NA       |
| c.159G>A                  | p.L53                  | 0.000 (0/760)                  | Addition            | AAGCAG   | No                       | NA       |
| c.384T>C                  | p.D128                 | 0.033 (60/1806)                | NC                  | NA       | NA                       | NA       |
| c.903G>A                  | p.S301                 | 0.003 (4/1406)                 | NC                  | NA       | Yes                      | No       |

Abbreviations: Chr, chromosome; Ctrl, controls; ESE, exon splicing enhancer; MAF, minor allele frequency; NA, not available; NC, no change.

<sup>a</sup>Counts over number of chromosomes screened.
